# Supplementary material for: Feasibility of Implementing Physical Activity Behavior Change Counseling in an Existing Cancer-Exercise Program
Source: MDPI journal article supplement (doi:10.3390/ijerph182312705), 2021-12-02
Supplement: s1 [file s1]

## SUPPLEMENTARY FILES

### SUPPLEMENTARY FILE 1. FIDELITY CHECKLIST

Use the numbers to the right of each item to indicate your agreement with the following statements about the Study. (Circle one number for each item.) \*Mark “not applicable” if you were not responsible for that specific activity (e.g., did not lead the discussion groups).

1= Never 1= some of the time 3= Most of the time 4= All of the time 0= Not applicable

#### General Administration

A. Were the following administrative tasks completed for all components (Supervised Exercise, Group Sessions, and Update Sessions)?

a. Staff training requirements met

1      2      3      4      0

b. Attendance documented

1      2      3      4      0

c. Participants program records completed and maintained

1      2      3      4      0

d. Follow up contact for participants who missed a session

1      2      3      4      0

#### Discussion Groups

A. Were PowerPoint slides used during the discussion group sessions?

1      2      3      4      0

B. Were the following topics covered in the discussion group sessions?

1      2      3      4      0

a. Blueprint for Success      1      2      3      4      0

b. Time management      1      2      3      4      0

c. Stress management      1      2      3      4      0

d. Exercise barriers      1      2      3      4      0

e. Exercise benefits      1      2      3      4      0

f. Goal setting      1      2      3      4      0

g. Role models      1      2      3      4      0

h. Behavior change      1      2      3      4      0

i. Relapse      1      2      3      4      0

C. Were group attendees encouraged to use the following items?

a. Group notebook      1      2      3      4      0

b. Exercise logs      1      2      3      4      0

c. Blueprint for Success      1      2      3      4      0

d. Journaling tasks in the notebook      1      2      3      4      0

D. Was group interaction facilitated by the use of discussion questions and notebook tasks?

1      2      3      4      0

E. Were group attendees given written information regarding local physical activity resources?

1      2      3      4      0

**Overall and/or Miscellaneous**

A. Were cancer-specific issues addressed?

1      2      3      4      0

B. Were participants held accountable for attendance, participation, exercising, and exercise logs?

1      2      3      4      0

C. Were program staff responsive to participant needs?

1      2      3      4      0

D. Were opportunities provided for program participant feedback?

1      2      3      4      0

E. Were group participants given regular encouragement regarding their exercise?

1      2      3      4      0

F. Were participants counseled about and/or assisted with identifying social support for exercise?

1      2      3      4      0

G. Were program participants taught ways to improve their motivation?

1      2      3      4      0

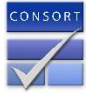

## SUPPLEMENTARY FILE 2: CONSORT 2010 checklist of information to include when reporting a pilot or feasibility trial

| Section/Topic             | Item No | Checklist item                                                                                                                                               | Reported on page No |
|---------------------------|---------|--------------------------------------------------------------------------------------------------------------------------------------------------------------|---------------------|
| <b>Title and abstract</b> |         |                                                                                                                                                              |                     |
|                           | 1a      | Identification as a pilot or feasibility randomised trial in the title                                                                                       | 1                   |
|                           | 1b      | Structured summary of pilot trial design, methods, results, and conclusions (for specific guidance see CONSORT abstract extension for pilot trials)          | 1                   |
| <b>Introduction</b>       |         |                                                                                                                                                              |                     |
| Background and objectives | 2a      | Scientific background and explanation of rationale for future definitive trial, and reasons for randomised pilot trial                                       | 2                   |
|                           | 2b      | Specific objectives or research questions for pilot trial                                                                                                    | 2                   |
| <b>Methods</b>            |         |                                                                                                                                                              |                     |
| Trial design              | 3a      | Description of pilot trial design (such as parallel, factorial) including allocation ratio                                                                   | 3                   |
|                           | 3b      | Important changes to methods after pilot trial commencement (such as eligibility criteria), with reasons                                                     | n/a                 |
| Participants              | 4a      | Eligibility criteria for participants                                                                                                                        | 3                   |
|                           | 4b      | Settings and locations where the data were collected                                                                                                         | 4                   |
|                           | 4c      | How participants were identified and consented                                                                                                               | 3                   |
| Interventions             | 5       | The interventions for each group with sufficient details to allow replication, including how and when they were actually administered                        | 3-4                 |
| Outcomes                  | 6a      | Completely defined prespecified assessments or measurements to address each pilot trial objective specified in 2b, including how and when they were assessed | 4, 5, 6             |
|                           | 6b      | Any changes to pilot trial assessments or measurements after the pilot trial commenced, with reasons                                                         | n/a                 |
|                           | 6c      | If applicable, prespecified criteria used to judge whether, or how, to proceed with future definitive trial                                                  | n/a                 |
| Sample size               | 7a      | Rationale for numbers in the pilot trial                                                                                                                     | 6                   |

|                                                      |     |                                                                                                                                                                                             |         |
|------------------------------------------------------|-----|---------------------------------------------------------------------------------------------------------------------------------------------------------------------------------------------|---------|
|                                                      | 7b  | When applicable, explanation of any interim analyses and stopping guidelines                                                                                                                | n/a     |
| Randomisation:                                       |     |                                                                                                                                                                                             |         |
| Sequence generation                                  | 8a  | Method used to generate the random allocation sequence                                                                                                                                      | 3       |
|                                                      | 8b  | Type of randomisation(s); details of any restriction (such as blocking and block size)                                                                                                      | 3       |
| Allocation concealment mechanism                     | 9   | Mechanism used to implement the random allocation sequence (such as sequentially numbered containers), describing any steps taken to conceal the sequence until interventions were assigned | 3       |
| Implementation                                       | 10  | Who generated the random allocation sequence, who enrolled participants, and who assigned participants to interventions                                                                     | 3       |
| Blinding                                             | 11a | If done, who was blinded after assignment to interventions (for example, participants, care providers, those assessing outcomes) and how                                                    | 3       |
|                                                      | 11b | If relevant, description of the similarity of interventions                                                                                                                                 | n/a     |
| Statistical methods                                  | 12  | Methods used to address each pilot trial objective whether qualitative or quantitative                                                                                                      | 6-7     |
| <b>Results</b>                                       |     |                                                                                                                                                                                             |         |
| Participant flow (a diagram is strongly recommended) | 13a | For each group, the numbers of participants who were approached and/or assessed for eligibility, randomly assigned, received intended treatment, and were assessed for each objective       | 8       |
|                                                      | 13b | For each group, losses and exclusions after randomisation, together with reasons                                                                                                            | 8       |
| Recruitment                                          | 14a | Dates defining the periods of recruitment and follow-up                                                                                                                                     | n/a     |
|                                                      | 14b | Why the pilot trial ended or was stopped                                                                                                                                                    | n/a     |
| Baseline data                                        | 15  | A table showing baseline demographic and clinical characteristics for each group                                                                                                            | 9       |
| Numbers analysed                                     | 16  | For each objective, number of participants (denominator) included in each analysis. If relevant, these numbers should be by randomised group                                                | 10-11   |
| Outcomes and estimation                              | 17  | For each objective, results including expressions of uncertainty (such as 95% confidence interval) for any estimates. If relevant, these results should be by randomised group              | Table 3 |
| Ancillary analyses                                   | 18  | Results of any other analyses performed that could be used to inform the future definitive trial                                                                                            | n/a     |

|                          |     |                                                                                                                                                     |       |
|--------------------------|-----|-----------------------------------------------------------------------------------------------------------------------------------------------------|-------|
| Harms                    | 19  | All important harms or unintended effects in each group (for specific guidance see CONSORT for harms)                                               | n/a   |
|                          | 19a | If relevant, other important unintended consequences                                                                                                | n/a   |
| <b>Discussion</b>        |     |                                                                                                                                                     |       |
| Limitations              | 20  | Pilot trial limitations, addressing sources of potential bias and remaining uncertainty about feasibility                                           | 19    |
| Generalisability         | 21  | Generalisability (applicability) of pilot trial methods and findings to future definitive trial and other studies                                   | 19    |
| Interpretation           | 22  | Interpretation consistent with pilot trial objectives and findings, balancing potential benefits and harms, and considering other relevant evidence | 18-19 |
|                          | 22a | Implications for progression from pilot to future definitive trial, including any proposed amendments                                               | n/a   |
| <b>Other information</b> |     |                                                                                                                                                     |       |
| Registration             | 23  | Registration number for pilot trial and name of trial registry                                                                                      | 19    |
| Protocol                 | 24  | Where the pilot trial protocol can be accessed, if available                                                                                        | 19    |
| Funding                  | 25  | Sources of funding and other support (such as supply of drugs), role of funders                                                                     | 19    |
|                          | 26  | Ethical approval or approval by research review committee, confirmed with reference number                                                          | 19    |

Citation: Eldridge SM, Chan CL, Campbell MJ, Bond CM, Hopewell S, Thabane L, et al. CONSORT 2010 statement: extension to randomised pilot and feasibility trials. BMJ. 2016;355.
